# Supplementary material
Source: Research Square preprint supplement (doi:10.21203/rs.3.rs-9672477/v1)
Supplement: Supplementary file 1 [file b18643b8cdca9aff27cd63d3.xlsx]

## Sheet: a czy mozesz pofrupowac lesne  
Sample ID / Label	Taxon	Geographic Origin / Population	Habitat / Lineage Group	Data Source	GenBank Acc. No.
P4_1	Pulsatilla patens	Poland, K. Puszczy Knyszyńskiej (KG)	Forest	This study	PV069742
P4_2	Pulsatilla patens	Poland, K. Puszczy Knyszyńskiej (KG)	Forest	This study	PV069740
P4_3	Pulsatilla patens	Poland, K. Puszczy Knyszyńskiej (KG)	Forest	This study	PV069741
P5_1	Pulsatilla patens	Poland, K. Puszczy Knyszyńskiej (SU)	Forest	This study	PQ726929
P5_2	Pulsatilla patens	Poland, K. Puszczy Knyszyńskiej (SU)	Forest	This study	PQ726930
P5_3	Pulsatilla patens	Poland, K. Puszczy Knyszyńskiej (SU)	Forest	This study	PQ726931
P12_1	Pulsatilla patens	Poland, Myszyniec (MY)	Forest	This study	PQ726922
P13_1	Pulsatilla patens	Poland, Rudne (RU)	Forest	This study	PV069739
P13_2	Pulsatilla patens	Poland, Rudne (RU)	Forest	This study	PV069738
P13_3	Pulsatilla patens	Poland, Rudne (RU)	Forest	This study	PV066214
P15_1	Pulsatilla patens	Poland, Zabiele (ZA)	Forest	This study	PV069750
P15_2	Pulsatilla patens	Poland, Zabiele (ZA)	Forest	This study	PV069751
P15_3	Pulsatilla patens	Poland, Zabiele (ZA)	Forest	This study	PV069752
P18_1	Pulsatilla patens	Poland, Góżnienisko-Lidzbarski P. K.	Forest	This study	PQ726920
P20_BIA	Pulsatilla patens	Belarus (BIA)	Forest	This study	PQ726917
P3_JA	Pulsatilla patens	Poland, Jazy (JA)	Meadow	This study	PQ726923
P8_1	Pulsatilla patens	Poland, Biebrzański N.P. (BI)	Meadow	This study	PV069747
P8_2	Pulsatilla patens	Poland, Biebrzański N.P. (BI)	Meadow	This study	PV069748
P8_3	Pulsatilla patens	Poland, Biebrzański N.P. (BI)	Meadow	This study	PV069749
P9_1	Pulsatilla patens	Poland, Poligon Orzysz (OR)	Meadow	This study	PV069744
P9_2	Pulsatilla patens	Poland, Poligon Orzysz (OR)	Meadow	This study	PV069746
P9_3	Pulsatilla patens	Poland, Poligon Orzysz (OR)	Meadow	This study	PQ726919
P9_4	Pulsatilla patens	Poland, Poligon Orzysz (OR)	Meadow	This study	PV069743
P9_5	Pulsatilla patens	Poland, Poligon Orzysz (OR)	Meadow	This study	PV069745
P14_14	Pulsatilla patens	Poland, Kolimagi (KO)	Meadow	This study	PQ726921
P19_1	Pulsatilla patens	Poland, Bocheniec (BO)	Meadow	Previous study	KR297057
P19_2	Pulsatilla patens	Poland, Bocheniec (BO)	Meadow	Previous study	KR297058
P21_YAM	Pulsatilla patens	Russia (YAM)	South	This study	PQ726932
P22_STR	Pulsatilla patens	Ukraine (STR)	South	This study	PQ726927
P22_STR-2	Pulsatilla patens	Ukraine (STR)	South	This study	PQ726928
P24_AJ	Pulsatilla patens	Slovakia (AJ)	South (P. vernalis capture)	This study	PQ726924
P26_KWAR	Pulsatilla patens	Romania (KWAR)	South	This study	PQ726925
P29_RETY	Pulsatilla patens	Romania (RETY)	South	This study	PQ726926
MN025345	P. patens subsp. multifida	China	Other (Asian)	Public database	MN025345
MN025346	P. patens subsp. multifida	China	Other (Asian)	Public database	MN025346
MN025347	P. patens subsp. multifida	China	Other (Asian)	Public database	MN025347
NC063528	Pulsatilla alpina	Switzerland, Graubunden	N/A	Public database	NC063528
[DODAJ_KOD]	Pulsatilla campanella	N/A	N/A	Public database	[Wpisz nr]
ON920514	Pulsatilla chinensis	N/A	N/A	Public database	ON920514
OR085847	Pulsatilla chinensis	N/A	N/A	Public database	OR085847
MN025349	Pulsatilla dahurica	N/A	N/A	Public database	MN025349
MN025344	Pulsatilla grandis	N/A	N/A	Public database	MN025344
P19_BO_h	Pulsatilla × hackelii	Poland, Bocheniec (BO)	Meadow	Previous study	PQ726918
NC063529	Pulsatilla occidentalis	US, California	N/A	Public database	NC063529
KR297059	Pulsatilla pratensis	Poland, Bocheniec	Forest	Previous study	KR297059
KR297060	Pulsatilla pratensis	Poland, Bocheniec	Forest	Previous study	KR297060
NC070435	Pulsatilla saxatilis	N/A	N/A	Public database	NC070435
P_vern_1	Pulsatilla vernalis	[Wpisz lokalizację]	Forest	Previous study	KR297061
P_vern_2	Pulsatilla vernalis	[Wpisz lokalizację]	Forest	Previous study	KR297062
A_cylindr	Anemone cylindrica	N/A	Outgroup ***	Public database	[Wpisz nr]
C_brevicaud	Clematis brevicaudata	N/A	Outgroup ****	Public database	[Wpisz nr]
